# Supplementary material for: ProPhylER: A curated online resource for protein function and structure based on evolutionary constraint analyses
Source: HighWire-hosted journal article supplement (doi:10.1101/gr.097121.109), 2009-10-21
Supplement: Binkley_genome97121_Mutation_Data.zip [file HBB_data.xls]

Alignment Position	Single-position evolutionary rate	Single-position mutation tolerance score	Regional evolutionary rate	Regional mutation tolerance	Normalized evolutionary constraint	Normalized mutation impact
1
2	0.302	0.750
3	1.360	1.000
4	0.421
5	2.584
6	4.388	1.000
7	2.061	0.583
8	0.049	1.000
9	0.158	1.000
10	4.185	1.000	1.921		0.000
11	2.402	1.000	1.900		0.011
12	0.446	0.250	1.848	0.778	0.039	0.000
13	1.981		1.812		0.059
14	4.383	1.000	1.768	0.761	0.082	0.026
15	1.266	0.500	1.684	0.742	0.127	0.058
16	0.136	0.750	1.644	0.726	0.149	0.082
17	2.826	1.000	1.627	0.705	0.158	0.117
18	0.161	1.000	1.564	0.678	0.192	0.159
19	0.201	0.000	1.502	0.643	0.226	0.215
20	2.009	0.667	1.492	0.621	0.231	0.250
21	0.815	0.333	1.463	0.596	0.246	0.291
22	2.897	1.000	1.430	0.586	0.264	0.306
23	2.942	1.000	1.355	0.559	0.305	0.350
24	1.703	0.333	1.266	0.519	0.353	0.414
25	0.070	0.000	1.153	0.480	0.413	0.475
26	1.858	1.000	1.049	0.452	0.469	0.527
27	0.257	0.333	0.936	0.410	0.535	0.611
28	0.451	0.083	0.824	0.373	0.607	0.686
29	0.068	0.000	0.704	0.343	0.683	0.748
30	0.838	1.000	0.608	0.320	0.743	0.794
31	0.442	0.250	0.503	0.281	0.810	0.874
32	0.359	0.000	0.430	0.260	0.857	0.915
33	0.213	0.333	0.385	0.252	0.885	0.932
34	0.695		0.363		0.899
35	0.199	0.000	0.326	0.240	0.923	0.957
36	0.395	0.000	0.351	0.240	0.907	0.957
37	0.062	0.000	0.383	0.258	0.886	0.920
38	0.136	0.667	0.420	0.283	0.863	0.869
39	0.035	0.000	0.456	0.305	0.840	0.826
40	0.626	0.333	0.502	0.338	0.811	0.757
41	0.045	1.000	0.540	0.383	0.787	0.667
42	0.575	0.000	0.581	0.418	0.761	0.596
43	0.071	0.000	0.639	0.465	0.724	0.500
44	3.642	1.000	0.731	0.525	0.665	0.405
45	1.079	0.500	0.785	0.571	0.631	0.331
46	0.071	0.167	0.819	0.605	0.610	0.277
47	0.070	1.000	0.872	0.640	0.576	0.220
48	0.129	1.000	0.950	0.672	0.527	0.169
49	0.068	0.500	1.078	0.691	0.454	0.138
50	0.032	1.000	1.212	0.702	0.381	0.120
51	2.307	1.000	1.391	0.714	0.285	0.103
52	2.228	0.667	1.537	0.708	0.207	0.111
53	3.971	0.900	1.629	0.699	0.157	0.126
54	0.116		1.684		0.128
55	1.656	0.000	1.755	0.681	0.090	0.155
56	2.005	0.500	1.786	0.670	0.073	0.172
57	4.303	1.000	1.770	0.656	0.082	0.195
58	0.036	1.000	1.656	0.633	0.143	0.232
59	3.559	0.000	1.545	0.597	0.203	0.288
60	1.410	1.000	1.346	0.568	0.309	0.335
61	0.037	0.667	1.151	0.527	0.415	0.401
62	1.283	1.000	1.008	0.490	0.491	0.461
63	0.445	0.125	0.892	0.436	0.563	0.559
64	0.041	0.083	0.773	0.390	0.639	0.652
65	0.070	0.500	0.689	0.342	0.692	0.749
66	0.613	0.333	0.672	0.300	0.703	0.834
67	0.159	0.000	0.695	0.263	0.688	0.910
68	0.037	0.000	0.738	0.238	0.661	0.961
69	0.781	0.000	0.848	0.219	0.591	1.000
70	2.140	0.667	0.964	0.224	0.517	0.989
71	0.717	0.000	1.040	0.234	0.474	0.969
72	0.517	0.000	1.117	0.269	0.433	0.899
73	1.284	0.000	1.203	0.317	0.386	0.801
74	3.569	1.000	1.265	0.372	0.353	0.688
75	0.163	0.000	1.241	0.409	0.366	0.613
76	1.885	0.000	1.241	0.463	0.366	0.504
77	1.916	0.500	1.201	0.529	0.387	0.398
78	0.706	1.000	1.127	0.582	0.427	0.312
79	0.942	1.000	1.053	0.611	0.467	0.266
80	0.234	1.000	1.018	0.636	0.486	0.227
81	1.382	1.000	0.988	0.636	0.502	0.227
82	0.548	0.500	0.931	0.611	0.539	0.266
83	0.051	0.000	0.877	0.582	0.573	0.312
84	1.697	1.000	0.868	0.566	0.579	0.339
85	0.413	1.000	0.819	0.525	0.610	0.405
86	0.997	0.000	0.786	0.471	0.631	0.490
87	0.603	0.000	0.758	0.425	0.648	0.581
88	3.013	1.000	0.730	0.404	0.666	0.624
89	0.068	0.000	0.639	0.370	0.724	0.692
90	0.032	0.000	0.550	0.352	0.781	0.729
91	0.152	0.667	0.478	0.348	0.827	0.738
92	0.068	0.000	0.409	0.333	0.870	0.767
93	0.041	0.000	0.341	0.319	0.913	0.797
94	0.249	1.000	0.302	0.317	0.938	0.801
95	0.529	0.111	0.261	0.310	0.964	0.814
96	0.381	1.000	0.220	0.301	0.990	0.833
97	0.068	0.000	0.204	0.278	1.000	0.880
98	0.041	0.250	0.228	0.266	0.985	0.903
99	0.037	0.125	0.253	0.249	0.969	0.938
100	0.044	0.000	0.278	0.229	0.953	0.979
101	0.198	0.000	0.307	0.229	0.935	0.979
102	0.603	0.000	0.346	0.229	0.910	0.979
103	0.036	0.667	0.381	0.229	0.888	0.978
104	0.071	0.000	0.427	0.225	0.858	0.986
105	2.137	0.833	0.510	0.235	0.806	0.967
106	0.358	0.000	0.550	0.249	0.781	0.938
107	0.068	0.000	0.586	0.269	0.758	0.898
108	0.070	0.000	0.624	0.292	0.733	0.851
109	0.281	1.000	0.681	0.329	0.697	0.776
110	1.092	0.000	0.749	0.351	0.654	0.732
111	0.912	0.000	0.810	0.385	0.616	0.663
112	0.697	0.000	0.887	0.431	0.566	0.569
113	2.579	1.000	0.967	0.498	0.515	0.447
114	0.384	1.000	1.019	0.551	0.485	0.363
115	0.360	0.500	1.089	0.602	0.448	0.282
116	0.278	0.000	1.164	0.649	0.408	0.205
117	1.616	1.000	1.237	0.703	0.368	0.119
118	1.434	0.750	1.327	0.733	0.320	0.072
119	1.348	1.000	1.422	0.756	0.268	0.036
120	2.589	1.000	1.503	0.766	0.225	0.018
121	1.597	1.000	1.541	0.752	0.205	0.041
122	2.797	0.867	1.554	0.719	0.197	0.095
123	0.071		1.571		0.188
124	0.754	1.000	1.599	0.688	0.173	0.143
125	0.354	0.750	1.613	0.645	0.166	0.212
126	4.597		1.626		0.159
127	2.955	0.500	1.551	0.590	0.199	0.300
128	0.434	0.000	1.449	0.535	0.254	0.388
129	0.775	0.000	1.367	0.492	0.298	0.456
130	0.539	1.000	1.298	0.465	0.335	0.500
131	3.304	0.000	1.239	0.429	0.367	0.573
132	0.622	0.400	1.153	0.406	0.413	0.620
133	0.051	1.000	1.056	0.388	0.466	0.656
134	0.343		0.967		0.516
135	0.455	0.000	0.879	0.359	0.572	0.715
136	2.228	0.000	0.842	0.342	0.595	0.749
137	1.171	1.000	0.798	0.335	0.623	0.765
138	0.037		0.731		0.665
139	0.279	0.000	0.674	0.312	0.702	0.810
140	1.684	0.500
141	0.197	0.333
142	0.068	0.000
143	0.360	0.250
144	0.415	0.200
145	0.986	0.000
146	0.074	0.000
147	0.041	0.300
