# Supplementary material for: ProPhylER: A curated online resource for protein function and structure based on evolutionary constraint analyses
Source: HighWire-hosted journal article supplement (doi:10.1101/gr.097121.109), 2009-10-21
Supplement: Binkley_genome97121_Mutation_Data.zip [file HBB_key.xls]

Sequence Name	Source Organism	Database Identifier	Source Database
human	Homo sapiens	P68871	UniProt
gorilla	Gorilla gorilla	P02024	UniProt
gibbon	Hylobates lar	P02025	UniProt
rhesus	Macaca mulatta	P02026	UniProt
macaque	Macaca fascicularis	P68223	UniProt
baboonPc	Papio cynocephalus	P02030	UniProt
baboonTg	Theropithecus gelada	P02029	UniProt
mandrill	Mandrillus sphinx	P08259	UniProt
colobusCp	Colobus polykomos	P19885	UniProt
colobusPb	Procolobus badius	P02033	UniProt
greenmonkey	Cercopithecus aethiops	P02028	UniProt
langur	Presbytis entellus	P02032	UniProt
howler	Alouatta belzebul	Q6WN29	UniProt
spidermonkeyAb	Ateles belzebuth	P68234	UniProt
spidermonkeyAp	Ateles paniscus	Q6WN22	UniProt
woollymonkey	Lagothrix lagotricha	Q6WN25	UniProt
saki	Pithecia pithecia	Q6WN27	UniProt
owlmonkey	Aotus trivirgatus	P02035	UniProt
tamarinSm	Saguinus mystax	P02038	UniProt
tamarinSn	Saguinus nigricollis	P68054	UniProt
marmosetCg	Callimico goeldii	Q6WN21	UniProt
squirrelmonkey	Saimiri sciureus	P02036	UniProt
capuchinCal	Cebus albifrons	P02040	UniProt
capuchinCap	Cebus apella	P67821	UniProt
capuchinCc	Cebus capucinus	P67822	UniProt
tarsierTb	Tarsius bancanus	P02051	UniProt
tarsierTs	Tarsius syrichta	P13557	UniProt
lemurEf	Eulemur fulvus	P02053	UniProt
lemurHg	Hapalemur griseus	Q7M3C2	UniProt
lemurVv	Varecia variegata	P21667	UniProt
lorisLt	Loris tardigradus	P02048	UniProt
lorisNc	Nycticebus coucang	P02049	UniProt
bushbaby	Otolemur crassicaudatus	Q03901	UniProt
shrewTg	Tupaia glis	P02052	UniProt
batAp	Antrozous pallidus	P14388	UniProt
batCm	Chalinolobus morio	P68087	UniProt
batCs	Cynopterus sphinx	P11754	UniProt
batMc	Macrotus californicus	P09840	UniProt
batMg	Macroderma gigas	P24660	UniProt
batMl	Megaderma lyra	P11752	UniProt
batMv	Myotis velifer	P11758	UniProt
batTb	Tadarida brasiliensis	P11756	UniProt
batTg	Taphozous georgianus	P28781	UniProt
flyingfoxPa	Pteropus alecto	P14391	UniProt
flyingfoxPp	Pteropus poliocephalus	P14392	UniProt
fruitbatRa	Rousettus aegyptiacus	P02058	UniProt
mouse	Mus musculus	P02088	UniProt
gundi	Ctenodactylus gundi	P20855	UniProt
rat	Rattus norvegicus	P02091	UniProt
molerat	Nannospalax ehrenbergi	P02090	UniProt
marmot	Marmota marmota	P08853	UniProt
groundsquirrelSc	Spermophilus citellus	P09421	UniProt
groundsquirrelStSF	Spermophilus townsendi	P07410	UniProt
hamsterMa	Mesocricetus auratus	P02094	UniProt
hamsterMb	Mesocricetus brandti	P18707	UniProt
muskrat	Ondatra zibethicus	P02093	UniProt
rabbit	Oryctolagus cuniculus	P02057	UniProt
hare	Lepus europaeus	P08535	UniProt
dog	Canis familiaris	P60524	UniProt
fox	Vulpes vulpes	P21201	UniProt
polarbear	Ursus maritimus	P68011	UniProt
pandaAm	Ailuropoda melanoleuca	P18983	UniProt
ferret	Mustela putorius	P68044	UniProt
mink	Mustela lutreola	P23602	UniProt
marten	Martes foina	P68053	UniProt
otter	Lutra lutra	P10893	UniProt
badgerMc	Mellivora capensis	P15449	UniProt
badgerMm	Meles meles	P02055	UniProt
pandaAf	Ailurus fulgens	P18982	UniProt
sealAg	Arctocephalus galapagoensis	P68047	UniProt
sealLw	Leptonychotes weddellii	P15166	UniProt
sealPv	Phoca vitulina	P09909	UniProt
cat	Felis catus	P07412	UniProt
lynx	Lynx lynx	P41328	UniProt
coati	Nasua nasua	P26916	UniProt
lion	Panthera leo	P68050	UniProt
leopardPpo	Panthera pardus	P04244	UniProt
civit	Paguma larvata	P19646	UniProt
aardwolf	Proteles cristatus	P23020	UniProt
hyena	Crocuta crocuta	P18986	UniProt
cowBf	Bos frontalis	P67819	UniProt
cowBj	Bos javanicus	P04346	UniProt
cowBt	Bos taurus	P02070	UniProt
yak	Bos grunniens	P02072	UniProt
kudu	Tragelaphus strepsiceros	P04245	UniProt
bison	Bison bonasus	P09422	UniProt
goatA	Capra hircus	P02077	UniProt
sheep	Ovis aries	P02075	UniProt
elk	Alces alces	P02073	UniProt
deer	Odocoileus virginianus	P02074	UniProt
reindeer	Rangifer tarandus	P21380	UniProt
camel	Camelus bactrianus	P68230	UniProt
llama	Lama glama	P68226	UniProt
hippo	Hippopotamus amphibius	P19016	UniProt
pig	Sus scrofa	P02067	UniProt
minke	Balaenoptera acutorostrata	P18984	UniProt
dolphin	Tursiops truncatus	P18990	UniProt
horse	Equus caballus	P02062	UniProt
kulan	Equus hemionus	P67823	UniProt
rhinoCs	Ceratotherium simum	P02066	UniProt
rhinoRu	Rhinoceros unicornis	P09907	UniProt
tapir	Tapirus terrestris	P02064	UniProt
hyrax	Procavia capensis	P02086	UniProt
manatee	Trichechus inunguis	P07415	UniProt
elephantEm	Elephas maximus	P02084	UniProt
elephantLa	Loxodonta africana	P02085	UniProt
shrewSm	Suncus murinus	P02060	UniProt
hedgehogEe	Erinaceus europaeus	P02059	UniProt
moleTe	Talpa europaea	P02061	UniProt
moleSa	Scalopus aquaticus	Q2KPA4	UniProt
moleSo	Scapanus orarius	Q2KPA3	UniProt
armidillo	Dasypus novemcinctus	P02087	UniProt
sloth	Bradypus tridactylus	P14526	UniProt
kangarooMg	Macropus giganteus	P02106	UniProt
kangarooMr	Macropus rufus	P02107	UniProt
wallaby	Macropus eugenii	Q6H1U7	UniProt
potoroo	Potorous tridactylus	P02108	UniProt
dunnart	Sminthopsis crassicaudata	Q28932	UniProt
opossum	Didelphis virginiana	P02109	UniProt
echidna	Tachyglossus aculeatus	P02110	UniProt
platypus	Ornithorhynchus anatinus	P02111	UniProt
chicken	Gallus gallus	P02112	UniProt
quail	Coturnix japonica	P30893	UniProt
partridge	Francolinus pondicerianus	P22742	UniProt
pheasant	Phasianus colchicus	P02113	UniProt
duckAp	Anas platyrhynchos	P02114	UniProt
duckCm	Cairina moschata	P14260	UniProt
duckAf	Aythya fuligula	P84792	UniProt
gooseAa	Anser anser	P02117	UniProt
gooseAi	Anser indicus	P02118	UniProt
gooseAs	Anseranas semipalmata	P02120	UniProt
gooseBc	Branta canadensis	P68944	UniProt
gooseCm	Chloephaga melanoptera	P07036	UniProt
condor	Vultur gryphus	P07411	UniProt
flamingo	Phoenicopterus ruber	P02121	UniProt
cormorant	Phalacrocorax carbo	P10782	UniProt
eagle	Aquila chrysaetos	P02122	UniProt
goshawk	Accipiter gentilis	P08851	UniProt
vulture	Aegypius monachus	P68061	UniProt
swift	Apus apus	P15165	UniProt
gull	Larus ridibundus	P08261	UniProt
skua	Catharacta maccormicki	P82113	UniProt
parakeet	Psittacula krameri	P21668	UniProt
sparrow	Passer montanus	P07406	UniProt
starling	Sturnus vulgaris	P02126	UniProt
blackbird	Turdus merula	P14524	UniProt
pidgeon	Columba livia	P11342	UniProt
turtledove	Streptopelia orientalis	Q7LZB9	UniProt
ostrich	Struthio camelus	P02123	UniProt
rhea	Rhea americana	P02124	UniProt
penguinAf	Aptenodytes forsteri	P80216	UniProt
penguinEc	Eudyptes crestatus	P10058	UniProt
iguana	Iguana iguana	P18987	UniProt
tuatara	Sphenodon punctatus	P10060	UniProt
monitor	Varanus exanthematicus	P18993	UniProt
indigosnake	Drymarchon corais	P0C0U8	UniProt
snakeLm	Liophis miliaris	P16418	UniProt
snakeMg	Microcephalophis gracilis	P41332	UniProt
cobra	Naja naja	P22743	UniProt
turtleCp	Chrysemys picta	P13274	UniProt
tortoiseGc	Geochelone carbonaria	Q98905	UniProt
tortoiseGn	Geochelone nigra	P83123	UniProt
