# Supplementary material for: ProPhylER: A curated online resource for protein function and structure based on evolutionary constraint analyses
Source: HighWire-hosted journal article supplement (doi:10.1101/gr.097121.109), 2009-10-21
Supplement: Binkley_genome97121_Mutation_Data.zip [file laci_data.xls]

Alignment Position	Single-position evolutionary rate	Single-position mutation tolerance score	Regional evolutionary rate	Regional mutation tolerance	Normalized evolutionary constraint	Normalized mutation impact
1	0.021					
2						
3						
4						
5						
6						
7						
8						
9						
10						
11						
12						
13						
14						
15						
16
17
18
19
20
21
22
23
24
25
26
27
28
29
30
31
32		
33		
34		
35		
36		
37		
38		
39		
40		
41		
42		
43		
44		
45		
46	0.532	3.833
47	1.582	3.250
48	0.890	2.231				
49	0.361	0.615				
50	0.547	2.000				
51	0.883	2.583				
52	0.024	1.308				
53	0.080	0.231	0.466		0.848	
54	0.020	0.583	0.453	1.794	0.857	0.750
55	0.919	3.667	0.440	1.774	0.865	0.757
56	0.898	3.667	0.412	1.715	0.884	0.776
57	0.221	0.833	0.383	1.608	0.903	0.810
58	0.513	2.917	0.359	1.507	0.919	0.842
59	0.021	1.308	0.327	1.342	0.940	0.895
60	0.069	0.000	0.311	1.205	0.950	0.939
61	0.867	1.833	0.306	1.118	0.954	0.967
62	0.294	0.583	0.288	1.048	0.966	0.989
63	0.082	0.231	0.271	1.014	0.977	1.000
64	0.083	0.308	0.271	1.028	0.977	0.996
65	0.070	0.167	0.295	1.105	0.961	0.971
66	0.025	0.000	0.329	1.232	0.939	0.930
67	0.021	0.000	0.370	1.392	0.912	0.879
68	0.814	2.846	0.438	1.638	0.866	0.800
69	0.083	1.538	0.514	1.858	0.816	0.730
70	0.658	3.667	0.589	2.053	0.767	0.667
71	0.603	3.917	0.660	2.208	0.719	0.618
72	1.576	3.667	0.752	2.320	0.659	0.582
73	1.100	2.167	0.813	2.382	0.618	0.562
74	0.080	0.615	0.849	2.394	0.595	0.558
75	0.403	1.917	0.897	2.438	0.562	0.544
76	1.767	4.000	0.954	2.480	0.525	0.531
77	2.187	2.333	0.971	2.431	0.514	0.546
78	0.019	1.000	0.948	2.377	0.529	0.564
79	0.191	2.333	0.941	2.363	0.533	0.568
80	2.531	3.667	0.951	2.381	0.527	0.562
81	0.625	3.083	0.909	2.369	0.555	0.566
82	0.021	0.000	0.877	2.372	0.576	0.565
83	1.158	3.667	0.859	2.404	0.588	0.555
84	1.449	3.667	0.821	2.362	0.613	0.568
85	0.234	0.583	0.754	2.259	0.658	0.601
86	0.374	1.462	0.703	2.205	0.691	0.619
87	1.288	3.667	0.682	2.173	0.705	0.629
88	0.995	3.667	0.635	2.091	0.736	0.655
89	0.364	0.917	0.567	1.946	0.781	0.702
90	0.431	3.692	0.523	1.828	0.810	0.740
91	0.040	0.250	0.485	1.687	0.835	0.785
92	0.646	0.692	0.447	1.540	0.861	0.832
93	0.134	0.500	0.416	1.428	0.881	0.867
94	0.076	1.077	0.406	1.366	0.888	0.887
95	0.890	2.417	0.406	1.316	0.888	0.903
96	0.527	2.231	0.398	1.270	0.893	0.918
97	0.020	0.000	0.395	1.248	0.895	0.925
98	0.178	0.250	0.435	1.321	0.868	0.902
99	0.728	2.500	0.488	1.444	0.833	0.862
100	0.037	0.000	0.536	1.570	0.801	0.822
101	0.753	0.583	0.584	1.699	0.770	0.781
102	0.466	1.333	0.627	1.836	0.741	0.737
103	0.752	2.583	0.670	1.977	0.713	0.692
104	0.736	3.667	0.700	2.095	0.693	0.654
105	0.245	2.750	0.744	2.190	0.664	0.623
106	2.467	4.000	0.800	2.289	0.627	0.592
107	1.066	3.667	0.804	2.301	0.624	0.588
108	0.585	1.538	0.796	2.267	0.629	0.599
109	0.038	0.000	0.795	2.243	0.630	0.607
110	0.454	1.077	0.799	2.255	0.627	0.603
111	0.848	2.500	0.803	2.247	0.625	0.605
112	0.336	2.308	0.799	2.219	0.628	0.614
113	1.683	3.000	0.805	2.193	0.624	0.622
114	1.010	3.583	0.791	2.161	0.633	0.633
115	0.623	1.000	0.760	2.106	0.653	0.650
116	1.072	3.250	0.750	2.102	0.660	0.652
117	0.951	1.500	0.742	2.094	0.665	0.654
118	0.462	2.833	0.721	2.104	0.679	0.651
119	0.122	0.000	0.694	2.066	0.697	0.663
120	0.618	2.083	0.678	2.054	0.707	0.667
121	0.717	2.167	0.677	2.066	0.708	0.663
122	1.028	1.833	0.674	2.097	0.710	0.653
123	0.360	2.538	0.669	2.141	0.714	0.639
124	0.486	2.154	0.678	2.166	0.707	0.631
125	1.281	2.500	0.713	2.194	0.684	0.622
126	0.231	2.917	0.744	2.248	0.664	0.605
127	0.404	1.769	0.793	2.299	0.632	0.589
128	0.727	1.000	0.849	2.365	0.595	0.567
129	1.553	3.667	0.913	2.454	0.552	0.539
130	0.938	3.583	0.956	2.507	0.523	0.522
131	0.204	1.667	0.996	2.504	0.498	0.523
132	0.888	0.000	1.053	2.493	0.473	0.527
133	2.403	3.500	1.104	2.546	0.451	0.510
134	1.166	3.917	1.112	2.558	0.447	0.506
135	0.981	4.000	1.121	2.531	0.443	0.514
136	0.949	2.000	1.139	2.491	0.435	0.527
137	1.938	3.833	1.163	2.474	0.425	0.533
138	0.858	2.308	1.171	2.422	0.421	0.549
139	0.850	0.538	1.199	2.408	0.409	0.554
140	0.746	0.769	1.253	2.473	0.385	0.533
141	0.922	2.667	1.324	2.589	0.354	0.495
142	0.898	1.538	1.396	2.689	0.322	0.458
143	1.119	2.231	1.488	2.839	0.282	0.402
144	2.407	4.000	1.582	3.032	0.241	0.330
145	2.036	4.000	1.662	3.225	0.206	0.258
146	1.831	3.917	1.710	3.377	0.185	0.202
147						
148						
149	1.813	4.000	1.746	3.530	0.169	0.145
150	2.776	3.923	1.764	3.662	0.161	0.096
151	2.746	4.000	1.739	3.742	0.172	0.066
152	1.045	4.000	1.658	3.764	0.207	0.058
153	1.015	3.667	1.591	3.768	0.237	0.056
154	1.180	4.000	1.518	3.746	0.269	0.064
155	2.724	4.000	1.440	3.694	0.303	0.084
156	0.486	2.750	1.337	3.609	0.349	0.115
157	0.856	4.000	1.249	3.535	0.387	0.143
158	1.192	4.000	1.173	3.456	0.420	0.172
159	1.315	3.154	1.097	3.372	0.454	0.204
160	0.154	2.417	1.030	3.286	0.483	0.236
161	2.343	4.000	0.996	3.204	0.498	0.266
162	0.649	3.583	0.931	3.093	0.540	0.308
163	0.762	3.417	0.869	2.957	0.581	0.358
164	1.062	1.333	0.815	2.836	0.617	0.403
165	0.205	2.308	0.773	2.754	0.645	0.434
166	0.762	3.750	0.741	2.668	0.666	0.466
167	0.603	3.583	0.735	2.585	0.670	0.496
168	0.601	2.167	0.749	2.513	0.661	0.520
169	0.220	1.231	0.796	2.475	0.629	0.532
170	1.154	1.615	0.872	2.486	0.579	0.529
171	0.501	1.538	0.958	2.544	0.522	0.510
172	0.982	4.000	1.051	2.659	0.474	0.469
173	0.385	1.750	1.160	2.766	0.426	0.429
174	0.813	1.667	1.291	2.876	0.369	0.388
175	2.631	3.692	1.431	3.023	0.307	0.334
176	1.743	4.000	1.545	3.173	0.257	0.277
177	2.515	4.000	1.637	3.310	0.217	0.227
178	2.605	4.000	1.693	3.422	0.192	0.185
179	0.818	3.083	1.710	3.497	0.185	0.157
180	0.897	4.000	1.735	3.557	0.173	0.135
181	2.556	4.000	1.760	3.584	0.163	0.125
182	1.438	2.462	1.741	3.611	0.171	0.115
183	2.183	3.917	1.705	3.645	0.187	0.102
184	2.303	4.000	1.632	3.626	0.219	0.109
185	1.176	3.250	1.542	3.573	0.258	0.129
186	1.529	3.833	1.454	3.515	0.297	0.150
187	1.788	3.846	1.367	3.423	0.335	0.185
188						
189						
190	1.204	3.231	1.277	3.303	0.375	0.229
191	1.195	3.846	1.185	3.188	0.415	0.272
192	0.617	4.000	1.090	3.075	0.457	0.314
193	1.101	3.750	1.030	2.962	0.483	0.356
194	0.531	1.833	0.972	2.835	0.513	0.404
195	0.671	1.583	0.958	2.759	0.522	0.432
196	0.682	2.091	0.970	2.738	0.515	0.440
197	0.706	0.923	1.005	2.746	0.494	0.437
198	0.677	1.385	1.049	2.827	0.475	0.407
199						
200						
201	1.476	3.833	1.103	2.946	0.451	0.362
202	1.230	3.846	1.162	3.047	0.425	0.324
203	1.446	4.000	1.219	3.106	0.400	0.302
204	1.023	3.846	1.252	3.166	0.386	0.280
205	2.363	4.000	1.285	3.221	0.371	0.260
206	1.168	3.538	1.292	3.250	0.368	0.249
207	2.066	3.231	1.308	3.261	0.361	0.245
208	0.627	4.000	1.284	3.229	0.371	0.257
209	0.374	2.000	1.259	3.159	0.383	0.283
210	2.158	3.000	1.239	3.104	0.391	0.303
211	1.024	0.417	1.214	3.067	0.402	0.317
212	0.434	4.000	1.183	3.095	0.416	0.307
213	0.845	3.667	1.163	3.096	0.425	0.306
214	2.216	4.000	1.161	3.098	0.426	0.306
215	2.298	4.000	1.136	3.093	0.437	0.307
216	0.253	0.917	1.070	3.052	0.465	0.323
217	0.438	4.000	1.034	3.078	0.482	0.313
218	0.451	3.917	1.016	3.104	0.489	0.303
219	2.513	3.500	0.999	3.105	0.497	0.303
220	0.287	2.333	0.951	3.103	0.527	0.304
221	0.272	1.750	0.912	3.052	0.552	0.323
222	2.159	3.583	0.886	3.058	0.570	0.321
223	0.229	3.500	0.828	3.069	0.608	0.316
224	0.142	1.500	0.800	3.070	0.627	0.316
225	0.761	4.000	0.821	3.109	0.613	0.302
226	1.787	4.000	0.832	3.075	0.606	0.314
227	0.642	3.833	0.813	3.011	0.618	0.338
228	0.291	3.750	0.794	2.950	0.631	0.361
229	0.305	0.333	0.798	2.840	0.628	0.402
230	1.080	4.000	0.800	2.786	0.627	0.422
231	0.983	4.000	0.803	2.706	0.625	0.452
232	0.666	2.154	0.840	2.619	0.601	0.484
233	1.903	2.083	0.870	2.523	0.580	0.517
234	0.489	1.167	0.885	2.413	0.571	0.552
235	0.730	1.583	0.903	2.322	0.559	0.581
236	0.747	4.000	0.932	2.259	0.540	0.602
237	0.038	0.000	0.964	2.174	0.518	0.629
238	0.128	2.958	1.014	2.180	0.490	0.627
239	1.911	4.000	1.065	2.120	0.468	0.646
240	2.602	4.000	1.116	2.059	0.445	0.666
241	0.574	0.000	1.140	1.997	0.435	0.685
242	2.403	1.462	1.163	1.990	0.425	0.688
243	0.492	0.000	1.153	1.984	0.429	0.690
244	0.496	1.333	1.151	2.041	0.430	0.671
245	1.175	2.500	1.176	2.131	0.419	0.642
246	1.214	3.500	1.194	2.259	0.411	0.602
247	0.025	0.333	1.184	2.325	0.415	0.580
248	2.742	3.833	1.210	2.468	0.404	0.534
249	2.047	4.000	1.221	2.616	0.399	0.485
250	0.343	2.250	1.232	2.764	0.394	0.430
251	0.272	0.923	1.262	2.905	0.381	0.377
252	1.160	3.917	1.330	3.090	0.351	0.308
253	2.502	3.833	1.400	3.228	0.320	0.257
254	0.958	4.000	1.427	3.337	0.309	0.217
255	0.142	2.000	1.463	3.416	0.293	0.187
256	2.774	4.000	1.540	3.539	0.259	0.142
257	2.456	4.000	1.576	3.616	0.244	0.113
258	1.479	4.000	1.615	3.691	0.226	0.085
259						
260	1.616	4.000	1.676	3.766	0.200	0.057
261	1.206	3.923	1.702	3.783	0.188	0.050
262	2.034	4.000	1.706	3.763	0.186	0.058
263	1.003	4.000	1.676	3.695	0.200	0.083
264	1.444	3.077	1.660	3.622	0.207	0.110
265	2.382	4.000	1.621	3.539	0.224	0.142
266						
267						
268	2.226	4.000	1.558	3.429	0.251	0.182
269	2.424	4.000	1.478	3.317	0.286	0.224
270	2.711	4.000	1.371	3.161	0.334	0.282
271	0.038	1.083	1.224	2.988	0.398	0.347
272	0.386	3.846	1.117	2.885	0.445	0.385
273	0.071	0.308	1.025	2.784	0.485	0.423
274	0.687	3.667	0.967	2.754	0.517	0.434
275	0.085	1.333	0.932	2.728	0.540	0.443
276	2.712	3.923	0.945	2.756	0.531	0.433
277	0.249	3.750	0.930	2.768	0.541	0.428
278	0.144	0.417	0.949	2.761	0.528	0.431
279	0.812	2.667	1.029	2.843	0.484	0.401
280	1.619	3.833	1.149	2.957	0.431	0.358
281	0.826	3.917	1.263	3.038	0.381	0.328
282	0.836	2.385	1.391	3.120	0.325	0.297
283	2.250	3.692	1.525	3.197	0.266	0.269
284	2.634	3.917	1.632	3.262	0.219	0.245
285	0.794	2.538	1.683	3.294	0.197	0.232
286	0.985	2.000	1.748	3.325	0.168	0.221
287	2.772	4.000	1.796	3.375	0.147	0.202
288	2.181	3.917	1.784	3.342	0.152	0.215
289	2.712	4.000	1.732	3.271	0.175	0.241
290	2.445	4.000	1.636	3.161	0.217	0.282
291	2.049	4.000	1.492	3.013	0.280	0.337
292	1.655	2.833	1.308	2.795	0.361	0.418
293	0.559	3.846	1.113	2.557	0.447	0.506
294	0.079	1.000	0.937	2.291	0.536	0.591
295	0.367	1.846	0.770	2.043	0.647	0.671
296	0.508	0.833	0.613	1.790	0.751	0.752
297	0.287	2.077	0.477	1.570	0.840	0.822
298	0.299	1.000	0.370	1.364	0.911	0.888
299	0.134	1.000	0.295	1.213	0.961	0.936
300	0.024	0.000	0.252	1.121	0.989	0.966
301	0.164	0.333	0.236	1.104	1.000	0.971
302	0.083	1.462	0.243	1.133	0.995	0.962
303	0.020	1.000	0.270	1.224	0.978	0.933
304	0.545	1.250	0.301	1.328	0.957	0.900
305	0.038	0.333	0.347	1.473	0.927	0.853
306	0.667	1.333	0.405	1.669	0.889	0.790
307	0.485	2.538	0.472	1.907	0.844	0.714
308	0.448	2.708	0.539	2.114	0.800	0.648
309	0.164	2.091	0.600	2.290	0.759	0.592
310	0.558	1.615	0.661	2.445	0.719	0.542
311	1.143	4.000	0.733	2.614	0.671	0.486
312	0.387	2.083	0.787	2.732	0.635	0.442
313	1.874	4.000	0.839	2.810	0.601	0.413
314	0.552	4.000	0.855	2.825	0.590	0.407
315	1.796	3.917	0.859	2.760	0.588	0.431
316	0.688	1.667	0.832	2.634	0.606	0.479
317	0.291	1.769	0.794	2.500	0.631	0.524
318	0.244	2.583	0.758	2.362	0.655	0.568
319	1.849	4.000	0.718	2.191	0.681	0.623
320	0.781	2.385	0.641	1.942	0.732	0.703
321	0.585	0.000	0.564	1.686	0.783	0.785
322	0.242	1.583	0.496	1.504	0.828	0.843
323	0.144	1.231	0.449	1.360	0.859	0.889
324	0.364	1.462	0.410	1.239	0.885	0.928
325	0.038	0.250	0.392	1.178	0.897	0.948
326	0.270	0.500	0.391	1.171	0.898	0.950
327	0.024	0.308	0.396	1.182	0.894	0.946
328	0.168	0.154	0.437	1.260	0.867	0.921
329	0.421	0.154	0.497	1.409	0.828	0.874
330	1.447	4.000	0.562	1.610	0.785	0.809
331	0.380	2.154	0.600	1.718	0.759	0.775
332	0.282	0.333	0.631	1.803	0.738	0.747
333	0.690	3.917	0.659	1.911	0.720	0.713
334	0.821	3.167	0.680	1.949	0.706	0.701
335	0.675	0.667	0.691	1.960	0.699	0.697
336	2.727	3.538	0.689	2.001	0.701	0.684
337	0.034	2.000	0.623	1.989	0.744	0.688
338	0.448	2.167	0.562	1.937	0.784	0.705
339	0.140	0.417	0.509	1.883	0.819	0.722
340	0.019	0.923	0.482	1.914	0.837	0.712
341	0.074	1.231	0.467	1.976	0.847	0.692
342	0.511	0.769	0.455	2.017	0.855	0.679
343	0.701	3.833	0.451	2.134	0.858	0.642
344	0.093	3.333	0.457	2.242	0.854	0.607
345	0.291	2.385	0.477	2.295	0.841	0.590
346	0.260	0.667	0.528	2.353	0.807	0.571
347	1.120	4.000	0.599	2.469	0.760	0.534
348	0.943	3.750	0.666	2.561	0.716	0.505
349	0.606	2.167	0.718	2.592	0.681	0.494
350	0.144	0.500	0.768	2.628	0.648	0.481
351	0.989	3.667	0.846	2.716	0.597	0.448
352	1.339	3.846	0.938	2.772	0.535	0.427
353	0.638	1.500	1.022	2.831	0.486	0.405
354	0.401	1.692	1.123	2.942	0.442	0.364
355	2.166	4.000	1.238	3.091	0.392	0.308
356	1.352	3.917	1.336	3.198	0.349	0.268
357	0.610	2.083	1.442	3.308	0.302	0.227
358	1.048	3.833	1.577	3.462	0.243	0.170
359	2.412	4.000	1.722	3.597	0.179	0.120
360	2.655	4.000	1.844	3.689	0.126	0.085
361	1.336	4.000	1.926	3.777	0.089	0.053
362	2.521	4.000	2.025	3.863	0.046	0.021
363	1.614	4.000	2.088	3.919	0.018	0.000
364						
365	2.725	4.000	2.125	3.916	0.002	0.001
366						
367						
368						
369	2.234	4.000	2.130	3.913	0.000	0.002
370	2.642	4.000	2.104	3.888	0.012	0.012
371	2.318	4.000	2.054	3.839	0.033	0.030
372	2.765	4.000	1.961	3.762	0.074	0.058
373	1.167	4.000	1.835	3.685	0.130	0.087
374	2.592	4.000	1.720	3.608	0.180	0.116
375	1.590	4.000	1.559	3.484	0.251	0.162
376	0.641	1.583	1.415	3.360	0.314	0.208
377	0.759	4.000	1.277	3.256	0.375	0.247
378	0.555	2.308	1.157	3.137	0.427	0.291
379	2.782	4.000	1.064		0.468	
380	0.037	1.917	0.946		0.530	
381	0.461	3.923	0.875		0.577	
382	0.652	4.000				
383	0.025	0.250				
384	2.099	4.000
385	0.121	0.731
386	0.266	2.846
387	1.033	
388	0.918	
389		
390	1.534	
391		
392		
393		
394		
395		
396		
397		
398		
399	1.584	
400	2.341
401	
402	
403	
404	
405	
406	
407	
408	
409	
410	
411	
412	
413	
414	
415	
416						
417						
418						
419						
420						
421	2.776					
422	2.690					
423	2.750					
