# Supplementary material for: ProPhylER: A curated online resource for protein function and structure based on evolutionary constraint analyses
Source: HighWire-hosted journal article supplement (doi:10.1101/gr.097121.109), 2009-10-21
Supplement: Binkley_genome97121_Mutation_Data.zip [file laci_key.xls]

Sequence Name	Source Organism	Database Identifier	Source Database
125933_Kpneumoniae	Klebsiella pneumoniae	GI:125933	NCBI
1786540_EcoliK12	Escherichia coli str. K-12 substr. MG1655	GI:1786540	NCBI
7160145_Scoelicolor	Streptomyces coelicolor A3(2)	GI:7160145	NCBI
29827572_Savermitilis	Streptomyces avermitilis MA-4680	GI:29827572	NCBI
49610955_Ecarotovora	Pectobacterium atrosepticum SCRI1043	GI:49610955	NCBI
50841230_Pacnes	Propionibacterium acnes KPA171202	GI:50841230	NCBI
51590690_Ypseudotuberculosis	Yersinia pseudotuberculosis IP 32953	GI:51590690	NCBI
66966596_ArthrobacterFB24	Arthrobacter sp. FB24	GI:66966596	NCBI
67985163_Kradiotolerans	Kineococcus radiotolerans SRS30216	GI:67985163	NCBI
68230041_FrankiaEAN1pec	Frankia sp. EAN1pec	GI:68230041	NCBI
71367217_NocardioidesJS614	Nocardioides sp. JS614	GI:71367217	NCBI
77957106_Ybercovieri	Yersinia bercovieri ATCC 43970	GI:77957106	NCBI
77960512_Ymollaretii	Yersinia mollaretii ATCC 43969	GI:77960512	NCBI
77975758_Yfrederiksenii	Yersinia frederiksenii ATCC 33641	GI:77975758	NCBI
77976902_Yintermedia	Yersinia intermedia ATCC 29909	GI:77976902	NCBI
84387231_Vsplendidus	Vibrio splendidus 12B01	GI:84387231	NCBI
88930870_Acellulolyticus	Acidothermus cellulolyticus 11B	GI:88930870	NCBI
90407276_Psychromonas	Psychromonas sp. CNPT3	GI:90407276	NCBI
106883790_Pingrahamii	Psychromonas ingrahamii 37	GI:106883790	NCBI
113938600_Haurantiacus	Herpetosiphon aurantiacus ATCC 23779	GI:113938600	NCBI
118472387_MSMEG1704	Mycobacterium smegmatis str. MC2 155	GI:118472387	NCBI
