# Supplementary material for: ProPhylER: A curated online resource for protein function and structure based on evolutionary constraint analyses
Source: HighWire-hosted journal article supplement (doi:10.1101/gr.097121.109), 2009-10-21
Supplement: Binkley_genome97121_Mutation_Data.zip [file lzm_key.xls]

Sequence Name	Source Organism	Database Identifier	Source Database
e_T4	Bacteriophage T4	e_T4	http://phage.bioc.tulane.edu/
e_RB32	Bacteriophage RB32	e_RB32	http://phage.bioc.tulane.edu/
e_T2	Bacteriophage T2	e_T2	http://phage.bioc.tulane.edu/
e_RB14	Bacteriophage RB14	e_RB14	http://phage.bioc.tulane.edu/
e_RB69	Bacteriophage RB69	e_RB69	http://phage.bioc.tulane.edu/
e_PHG25	Aeromonas phage 25	e_PHG25	http://phage.bioc.tulane.edu/
e_44RR	44RR2.8t	e_44RR	http://phage.bioc.tulane.edu/
e_PHG31	Phage 31	e_PHG31	http://phage.bioc.tulane.edu/
e_PHG65	Aeromonas phage 65	e_PHG65	http://phage.bioc.tulane.edu/
e_AEH1	Aeh1	e_AEH1	http://phage.bioc.tulane.edu/
5_T4	Bacteriophage T4	5_T4	http://phage.bioc.tulane.edu/
5_RB32	Bacteriophage RB32	5_RB32	http://phage.bioc.tulane.edu/
5_RB14	Bacteriophage RB14	5_RB14	http://phage.bioc.tulane.edu/
5_RB69	Bacteriophage RB69	5_RB69	http://phage.bioc.tulane.edu/
5_JS98	Bacteriophage JS98	5_JS98	http://phage.bioc.tulane.edu/
5_RB16	Bacteriophage RB16	5_RB16	http://phage.bioc.tulane.edu/
5_RB43	Bacteriophage RB43	5_RB43	http://phage.bioc.tulane.edu/
5_PHG31	Phage 31	5_PHG31	http://phage.bioc.tulane.edu/
5_44RR	44RR2.8t	5_44RR	http://phage.bioc.tulane.edu/
5_PHG25	Aeromonas phage 25	5_PHG25	http://phage.bioc.tulane.edu/
5_PHG65	Aeromonas phage 65	5_PHG65	http://phage.bioc.tulane.edu/
5_RB49	Bacteriophage RB49	5_RB49	http://phage.bioc.tulane.edu/
5_AEH1	Aeh1	5_AEH1	http://phage.bioc.tulane.edu/
33300847_phiKMV	Pseudomonas phage phiKMV	GI:33300847	NCBI
84362526_Bdolosa	Burkholderia dolosa AUO158	GI:84362526	NCBI
83721086_Bthailandensis	Burkholderia thailandensis E264	GI:83721086	NCBI
56750786_Selongatus	Synechococcus elongatus PCC 6301	GI:56750786	NCBI
95926610_Cburnetii	Coxiella burnetii RSA 331	GI:95926610	NCBI
