# Supplementary material for: ProPhylER: A curated online resource for protein function and structure based on evolutionary constraint analyses
Source: HighWire-hosted journal article supplement (doi:10.1101/gr.097121.109), 2009-10-21
Supplement: Binkley_genome97121_Mutation_Data.zip [file p53_data.xls]

Alignment Position	Single-position evolutionary rate	Single-position mutation tolerance score	Regional evolutionary rate	Regional mutation tolerance	Normalized evolutionary constraint	Normalized mutation impact
1						
2						
3						
4						
5						
6						
7						
8						
9						
10						
11						
12						
13						
14						
15						
16
17
18
19
20
21
22
23
24
25
26
27
28
29
30
31
32
33
34
35
36
37
38
39
40
41
42
43
44
45
46
47
48
49
50
51
52
53
54
55
56
57
58
59
60
61
62
63
64
65
66
67
68
69
70
71
72
73
74
75
76
77
78
79
80
81
82
83
84
85
86
87
88
89
90
91
92
93
94
95
96
97
98
99
100
101
102
103
104
105
106
107
108
109
110
111
112
113
114
115
116
117
118
119
120
121
122
123
124
125
126
127
128
129
130
131
132
133
134
135
136
137
138
139
140
141
142
143
144
145
146
147
148
149
150
151
152
153
154
155
156
157
158
159
160
161
162
163
164
165
166
167
168
169
170
171
172
173
174
175
176
177
178
179
180
181
182
183
184
185
186
187
188
189
190
191
192
193
194
195
196
197
198
199
200
201
202
203
204
205
206
207
208
209
210
211
212
213
214
215
216
217
218
219
220
221
222
223
224
225
226
227
228
229
230
231
232
233
234
235
236
237
238
239
240						
241						
242						
243						
244	0.181	0.038				
245	0.086	0.029				
246	0.743	0.071				
247	4.229	0.100				
248	0.168	0.024				
249	0.096	0.050				
250	0.131	0.007				
251	0.821	0.031				
252	0.485	0.026	0.494	0.036	0.599	0.602
253	0.189	0.006	0.431	0.035	0.669	0.618
254	0.329	0.050	0.370	0.035	0.738	0.622
255	0.168	0.071	0.316	0.034	0.798	0.636
256	0.099	0.013	0.287	0.034	0.831	0.648
257	0.131	0.048	0.309	0.034	0.806	0.639
258	0.286	0.048	0.379	0.035	0.728	0.628
259	0.189	0.008	0.454	0.036	0.643	0.615
260	0.155	0.032	0.541	0.037	0.546	0.586
261	0.310	0.020	0.635	0.039	0.478	0.563
262	0.337	0.034	0.730	0.040	0.439	0.541
263	1.173	0.023	0.832	0.041	0.397	0.524
264	1.570	0.077	0.915	0.043	0.364	0.504
265	0.100	0.037	0.975	0.043	0.339	0.498
266	3.967	0.077	1.046	0.043	0.310	0.499
267	0.950	0.063	1.026	0.042	0.318	0.520
268	1.145	0.083	0.986	0.039	0.334	0.556
269	0.155	0.006	0.923	0.035	0.360	0.621
270	0.155	0.009	0.866	0.032	0.383	0.676
271	1.042	0.038	0.811	0.029	0.406	0.727
272	0.477	0.013	0.738	0.025	0.436	0.782
273	1.115	0.014	0.670	0.022	0.464	0.836
274	1.008	0.014	0.596	0.019	0.494	0.875
275	0.370	0.005	0.502	0.018	0.590	0.900
276	0.117	0.005	0.453	0.017	0.645	0.905
277	0.099	0.011	0.420	0.018	0.681	0.892
278	0.761	0.036	0.414	0.020	0.688	0.863
279	0.099	0.010	0.400	0.021	0.704	0.840
280	0.299	0.027	0.389	0.023	0.716	0.808
281	0.181	0.006	0.385	0.026	0.720	0.770
282	0.131	0.026	0.384	0.029	0.722	0.727
283	0.364	0.067	0.395	0.031	0.710	0.690
284	0.413	0.033	0.417	0.032	0.685	0.671
285	0.589	0.040	0.434	0.033	0.665	0.664
286	1.182	0.018	0.445	0.032	0.653	0.670
287	0.770	0.034	0.430	0.032	0.670	0.679
288	0.278	0.056	0.407	0.031	0.696	0.689
289	0.127	0.050	0.379	0.029	0.728	0.718
290	0.100	0.024	0.353	0.027	0.756	0.750
291	0.100	0.006	0.329	0.025	0.784	0.788
292	0.631	0.029	0.320	0.023	0.794	0.808
293	0.117	0.001	0.313	0.024	0.802	0.793
294	0.516	0.003	0.321	0.026	0.792	0.766
295	0.155	0.014	0.343	0.029	0.768	0.716
296	0.106	0.026	0.379	0.033	0.727	0.654
297	0.106	0.003	0.433	0.037	0.667	0.588
298	0.127	0.059	0.497	0.045	0.595	0.488
299	0.117	0.013	0.564	0.051	0.521	0.438
300	1.317	0.077	0.630	0.059	0.480	0.387
301	1.040	0.167	0.674	0.065	0.462	0.344
302	1.124	0.033	0.709	0.067	0.448	0.324
303						
304	1.471	0.083	0.719	0.069	0.444	0.309
305	0.339	0.077	0.701	0.070	0.451	0.308
306	0.800	0.034	0.681	0.068	0.460	0.318
307						
308						
309	0.848	0.200	0.643	0.067	0.475	0.328
310	0.280	0.038	0.587	0.061	0.498	0.370
311	0.155	0.020	0.527	0.056	0.562	0.406
312	0.717	0.059	0.466	0.051	0.630	0.440
313	0.700	0.048	0.406	0.047	0.698	0.468
314	0.106	0.006	0.367	0.046	0.741	0.479
315	0.168	0.011	0.382	0.045	0.724	0.487
316	0.286	0.009	0.417	0.045	0.685	0.484
317	0.117	0.042	0.465	0.048	0.631	0.466
318	0.100	0.028	0.523	0.050	0.566	0.451
319	0.127	0.100	0.627	0.060	0.481	0.379
320	0.171	0.038	0.743	0.069	0.434	0.313
321	0.096	0.125	0.861	0.078	0.386	0.249
322	2.140	0.100	1.017	0.085	0.322	0.194
323						
324	3.414	0.030	1.149	0.092	0.268	0.147
325	0.464	0.045	1.201	0.099	0.246	0.100
326	1.364	0.125	1.265	0.105	0.220	0.055
327	0.181	0.007	1.300	0.108	0.206	0.029
328	3.121	0.500	1.334	0.113	0.192	0.000
329	0.915	0.100	1.293	0.105	0.209	0.056
330	0.324	0.034	1.231	0.096	0.234	0.119
331	2.598	0.077	1.168	0.087	0.260	0.181
332	1.629	0.077	1.043	0.079	0.311	0.244
333	0.263	0.042	0.906	0.070	0.367	0.306
334	1.691	0.071	0.807	0.061	0.408	0.372
335	0.117	0.014	0.674	0.051	0.462	0.442
336	0.106	0.013	0.575	0.043	0.508	0.497
337	0.086	0.014	0.478	0.036	0.617	0.601
338	0.100	0.013	0.422	0.036	0.680	0.606
339	0.307	0.048	0.383	0.038	0.723	0.576
340	0.100	0.024	0.351	0.040	0.759	0.541
341	0.155	0.059	0.354	0.044	0.756	0.493
342	0.181	0.003	0.389	0.047	0.716	0.468
343	0.127	0.059	0.438	0.052	0.661	0.433
344	1.674	0.063	0.506	0.057	0.585	0.397
345	0.155	0.100	0.535	0.062	0.552	0.364
346	0.371	0.053	0.566	0.064	0.518	0.345
347	0.745	0.100	0.593	0.067	0.496	0.326
348	0.775	0.083	0.604	0.068	0.491	0.322
349	0.426	0.083	0.604	0.067	0.491	0.327
350	1.363	0.038	0.609	0.065	0.489	0.343
351	1.175	0.077	0.584	0.062	0.499	0.360
352	0.093	0.045	0.534	0.058	0.554	0.390
353	0.093	0.091	0.484	0.054	0.609	0.422
354	0.297	0.022	0.454	0.048	0.643	0.463
355	0.381	0.100	0.420	0.043	0.682	0.499
356	0.181	0.007	0.383	0.036	0.723	0.604
357	0.269	0.028	0.352	0.031	0.758	0.687
358	1.158	0.011	0.326	0.026	0.787	0.764
359	0.102	0.005	0.279	0.022	0.840	0.829
360	0.189	0.006	0.247	0.018	0.875	0.887
361	0.096	0.011	0.227	0.016	0.898	0.926
362	0.086	0.019	0.206	0.014	0.921	0.959
363	0.086	0.006	0.187	0.013	0.943	0.982
364	0.189	0.006	0.170	0.011	0.962	1.000
365						
366						
367	0.102	0.029	0.155	0.012	0.979	0.998
368	0.171	0.006	0.145	0.012	0.989	0.991
369	0.171	0.002	0.136	0.013	1.000	0.970
370	0.102	0.008	0.138	0.015	0.998	0.943
371	0.096	0.034	0.142	0.017	0.993	0.915
372	0.117	0.001	0.148	0.019	0.987	0.887
373	0.117	0.002	0.153	0.021	0.981	0.851
374	0.155	0.012	0.159	0.023	0.974	0.810
375	0.098	0.016	0.178	0.026	0.953	0.769
376	0.469	0.077	0.209	0.029	0.919	0.721
377	0.093	0.050	0.257	0.032	0.864	0.680
378	0.098	0.028	0.311	0.034	0.804	0.647
379	0.295	0.016	0.382	0.037	0.724	0.601
380	0.093	0.063	0.453	0.040	0.645	0.542
381	0.168	0.030	0.524	0.043	0.564	0.498
382	0.127	0.010	0.596	0.045	0.494	0.481
383	1.349	0.017	0.666	0.048	0.465	0.465
384	0.904	0.063	0.718	0.051	0.444	0.445
385	2.284	0.091	0.752	0.053	0.430	0.429
386	0.492	0.053	0.738	0.054	0.436	0.422
387	1.377	0.125	0.715	0.054	0.445	0.419
388	0.470	0.083	0.660	0.052	0.468	0.434
389	0.168	0.032	0.599	0.048	0.493	0.462
390	0.171	0.006	0.543	0.044	0.544	0.490
391	0.117	0.020	0.487	0.041	0.607	0.534
392	0.979	0.063	0.431	0.037	0.670	0.593
393	0.334	0.053	0.369	0.032	0.738	0.670
394	0.174	0.011	0.313	0.027	0.802	0.755
395	0.127	0.020	0.283	0.023	0.836	0.823
396	0.100	0.007	0.257	0.018	0.865	0.887
397	0.117	0.001	0.247	0.016	0.876	0.928
398	0.675	0.014	0.241	0.014	0.882	0.953
399	0.189	0.007	0.228	0.013	0.897	0.974
400	0.099	0.014	0.217	0.012	0.909	0.983
401	0.189	0.013	0.208	0.012	0.920	0.993
402	0.155	0.004	0.207	0.012	0.921	0.993
403	0.171	0.019	0.217	0.013	0.909	0.975
404	0.117	0.005	0.227	0.015	0.898	0.951
405	0.116	0.008	0.253	0.017	0.868	0.912
406	0.117	0.002	0.300	0.020	0.816	0.870
407	0.560	0.014	0.350	0.023	0.761	0.818
408	0.451	0.071	0.401	0.026	0.703	0.760
409	0.127	0.006	0.462	0.029	0.635	0.714
410	0.127	0.009	0.544	0.034	0.542	0.648
411	0.888	0.050	0.662	0.039	0.467	0.569
412	0.096	0.059	0.784	0.043	0.417	0.502
413	1.485	0.063	0.922	0.047	0.361	0.472
414	1.746	0.024	1.043	0.050	0.311	0.450
415	0.366	0.056	1.153	0.054	0.266	0.417
416	0.607	0.043	1.272	0.059	0.217	0.385
417	1.426	0.077	1.421	0.063	0.156	0.354
418	1.962	0.100	1.571	0.068	0.095	0.321
419	2.931	0.067	1.686	0.071	0.048	0.299
420	1.933	0.036	1.758	0.074	0.018	0.275
421	1.281	0.083	1.794	0.078	0.003	0.247
422	1.527	0.045	1.802	0.087	0.000	0.185
423	2.511	0.167	1.802	0.098	0.000	0.103
424	1.297	0.091				
425	3.050	0.067				
426						
427						
428						
429						
430						
431						
432	2.510	0.100
433	0.986	0.077
434	2.233	0.143
435	0.131	0.063
436	0.117	0.500
437	0.976	0.250
438		
439		
440		
441		
442		
443		
444		
445		
446		
447		
448
449
450
451
452
453
454
455
456
457
458
459
460
461
462
463
464
465
466
467
468
469
470
471
472
473
474
475
476
477
478
479
480
481
482
483
484
485
486
487
488
489
490
491
492
493
494
495
496
497
498
499
500
501
502
503
504
505
506
507
508
509
510
511
512
513
514
515
516
517
518
519
520
521
522
523
524
525
526
527
528
529
530
531
532
533
534
535
536
537
538
539
540
541
542
543
544
545
546
547
548
549
550
551
552
553
554
555
556
557
558
559
560
561
562
563
564
565
566
567
568
569
570
571
572
573
574
575
576
577
578
579
580
581
582
583
584
585
586
587
588
589
590
591
592
593
594
595
596
597
598
599
600
601
602
603
604
605
606
607
608
609
610
611
612
613
614
615
616
617
618
619
620
621
622
623
624
625
626
627
628
629
630
631
632
633
634
635
636
637
638
639
640
641
642
643
644
645
646
647
648
649
650
651
652
653
654
655
656
657
658
659
660
661
662
663
664
665
666
667
668
669
670
671
672
673
674
675
676
677
678
679
680
681
682
683
684
685
686
687
688
689
690
691
692
693
694
695
696
697
698
699
700
701
702
703
704
705
706
707
708
709
710
711
712
713
714
715
716
717
718
719
720
721
722
723
724
725
726
727
728
729
730
731
732
733
734
735
736
737
738
739
740
741
742
743
744
745
746
747
748
749
750
751
752
753
754
755
756
757
758
759
760
761
762
763
764
765
766
767
768
769
770
771
772
773
774
775
776
777
778
779
780
781
782
783
784						
785						
786						
787						
788						
789						
790						
791						
792						
793						
794						
795						
796						
797						
798						
799						
