# Supplementary material for: ProPhylER: A curated online resource for protein function and structure based on evolutionary constraint analyses
Source: HighWire-hosted journal article supplement (doi:10.1101/gr.097121.109), 2009-10-21
Supplement: Binkley_genome97121_Mutation_Data.zip [file p53_key.xls]

Sequence Name	Source Organism	Database Identifier	Source Database
8400738_Hsapiens	Homo sapiens	8400738	NCBI
P53_MACFA	Macaca fascicularis	47117801	NCBI
P53_CERAE	Chlorocebus aethiops	129367	NCBI
P53_TUPGB	Tupaia glis	10720194	NCBI
P53_MOUSE	Mus musculus	172047304	NCBI
1813451_Mnatalensis	Mastomys natalensis	1813451	NCBI
P53_RAT	Rattus norvegicus	129372	NCBI
51490680_Sjudaei	Spalax judaei	51490680	NCBI
P53_MESAU	Mesocricetus auratus	129370	NCBI
P53_CRIGR	Cricetulus griseus	2499428	NCBI
P53_SPEBE	Spermophilus beecheyi	2842672	NCBI
P53_MARMO	Marmota monax	10720190	NCBI
P53_CAVPO	Cavia porcellus	10720197	NCBI
P53_RABIT	Oryctolagus cuniculus	2842741	NCBI
P53_BOSIN	Bos indicus	54038798	NCBI
P53_SHEEP	Ovis aries	1709531	NCBI
P53_PIG	Sus scrofa	10720186	NCBI
P53_DELLE	Delphinapterus leucas	75065695	NCBI
P53_CANFA	Canis familiaris	6093639	NCBI
P53_FELCA	Felis catus	1171969	NCBI
P53_HORSE	Equus caballus	2829679	NCBI
ENSDNOP00000004075	Dasypus novemcinctus	ENSDNOP00000004075	Ensembl
P53_CHICK	Gallus gallus	129368	NCBI
P53_XENLA	Xenopus laevis	129374	NCBI
46359085_Xtropicalis	Xenopus tropicalis	46359085	NCBI
113203521_Amexicanum	Ambystoma mexicanum	113203521	NCBI
