# Supplementary material for: ProPhylER: A curated online resource for protein function and structure based on evolutionary constraint analyses
Source: HighWire-hosted journal article supplement (doi:10.1101/gr.097121.109), 2009-10-21
Supplement: Binkley_genome97121_Mutation_Data.zip [file protease_data.xls]

Alignment Position	Single-position evolutionary rate	Single-position mutation tolerance score	Regional evolutionary rate	Regional mutation tolerance	Normalized evolutionary constraint	Normalized mutation impact
1	0.914	1.670
2	0.762	2.000
3	1.975	1.250
4	1.425	1.500
5	0.467	0.000
6	1.776	2.000
7	1.022	0.670
8	0.361	0.330
9	0.146	0.500	1.201	1.106	0.351	0.295
10	2.052	1.500	1.257	1.142	0.309	0.253
11	1.111	1.000	1.305	1.186	0.272	0.203
12	2.338	2.000	1.349	1.248	0.239	0.131
13	0.814	1.330	1.381	1.301	0.214	0.069
14	2.799	1.800	1.418	1.344	0.187	0.020
15	0.680	0.670	1.395	1.345	0.204	0.018
16	1.288	1.000	1.382	1.361	0.214	0.000
17	0.790	1.500	1.351	1.361	0.238	0.001
18	1.471	2.000	1.305	1.327	0.272	0.040
19	2.624	2.000	1.226	1.250	0.332	0.128
20	1.072	1.500	1.108	1.143	0.422	0.253
21	1.786	2.000	0.979	1.010	0.522	0.405
22	0.554	0.330	0.845	0.870	0.633	0.554
23	0.303	0.250	0.710	0.740	0.745	0.673
24	0.396	0.500	0.605	0.640	0.833	0.765
25	0.037	0.000	0.506	0.540	0.914	0.857
26	0.071	0.000	0.434	0.477	0.974	0.915
27	0.057	0.000	0.404	0.447	1.000	0.942
28	0.075	0.000	0.420	0.454	0.986	0.936
29	0.148	0.000	0.490	0.510	0.928	0.884
30	0.835	1.330	0.585	0.597	0.849	0.804
31	0.208	0.250	0.699	0.692	0.754	0.717
32	0.232	1.000	0.836	0.784	0.640	0.632
33	0.668	0.400	1.000	0.880	0.504	0.545
34	0.895	2.000	1.184	0.980	0.364	0.440
35	2.704	1.170	1.364	1.055	0.228	0.353
36	2.479	1.000	1.492	1.127	0.131	0.271
37	1.819	2.000	1.569	1.198	0.072	0.189
38	1.318	1.000	1.623	1.244	0.031	0.135
39
40
41
42
43	1.408	1.250	1.653	1.266	0.009	0.110
44	1.661	0.000	1.664	1.291	0.000	0.081
45	2.367	2.000	1.638	1.319	0.020	0.049
46	2.621	0.670	1.559	1.317	0.080	0.051
47	1.383	2.000	1.425	1.310	0.181	0.060
48	1.119	2.000	1.272	1.278	0.298	0.097
49	0.797	2.000	1.137	1.235	0.400	0.145
50
51	1.682	2.000	1.023	1.172	0.486	0.219
52	0.548	0.000	0.909	1.108	0.580	0.293
53	0.482	1.400	0.805	1.056	0.666	0.352
54	0.057	0.000	0.718	0.991	0.739	0.428
55	0.216	0.600	0.664	0.937	0.783	0.490
56	0.162	0.500	0.642	0.894	0.801	0.532
57	0.266	0.000	0.662	0.865	0.785	0.558
58	1.071	2.000	0.704	0.877	0.750	0.547
59	0.749	1.250	0.742	0.889	0.719	0.536
60	1.562	2.000	0.807	0.920	0.664	0.508
61	0.635	0.000	0.863	0.938	0.618	0.489
62	0.845	0.400	0.929	0.956	0.563	0.468
63	1.240	1.000	0.989	0.996	0.513	0.422
64
65	0.599	0.000	1.047	1.033	0.468	0.379
66	1.023	1.500	1.110	1.078	0.420	0.327
67	1.025	1.330	1.162	1.110	0.380	0.290
68	0.692	2.000	1.227	1.130	0.331	0.267
69	2.898	2.000	1.301	1.137	0.276	0.259
70	0.665	1.000	1.335	1.136	0.250	0.261
71	1.574	0.000	1.385	1.142	0.212	0.254
72	0.685	1.170	1.411	1.160	0.192	0.232
73	2.340	1.750	1.437	1.154	0.172	0.239
74	1.288	0.000	1.426	1.118	0.181	0.281
75	1.077	1.500	1.407	1.090	0.195	0.313
76
77
78
79
80
81
82
83	2.796	1.670	1.388	1.043	0.210	0.367
84	0.968	1.000	1.318	0.987	0.262	0.432
85	1.878	2.000	1.243	0.931	0.319	0.497
86	1.065	0.630	1.160	0.850	0.382	0.572
87	0.621	1.000	1.068	0.780	0.452	0.636
88	0.450	0.000	0.985	0.686	0.517	0.723
89	0.458	0.000	0.901	0.610	0.586	0.792
90	1.362	0.670	0.842	0.559	0.635	0.840
91	1.086	0.000	0.767	0.491	0.698	0.902
92	0.512	1.250	0.678	0.441	0.772	0.947
93	0.738	0.000	0.613	0.394	0.826	0.991
94
95	0.282	0.000	0.552	0.384	0.877	1.000
96	0.713	1.140	0.511	0.398	0.911	0.987
97	0.354	0.000	0.478	0.409	0.938	0.977
98	0.199	0.330	0.466	0.444	0.948	0.945
99	0.601	0.250	0.467	0.488	0.947	0.904
100	0.057	0.000	0.464	0.530	0.950	0.865
101	0.038	0.000	0.489	0.583	0.929	0.817
102	0.138	1.000	0.541	0.645	0.886	0.761
103	0.846	2.000	0.600	0.697	0.836	0.713
104	0.301	0.000	0.658	0.715	0.788	0.696
105	1.082	1.330	0.721	0.737	0.736	0.676
106	1.724	1.000
107	0.948	1.400
108	0.479	0.330
109	1.048	0.200
110	1.110	0.670
111	0.375	0.000
112	0.878	1.250
113	0.687	0.330
