# Supplementary material for: ProPhylER: A curated online resource for protein function and structure based on evolutionary constraint analyses
Source: HighWire-hosted journal article supplement (doi:10.1101/gr.097121.109), 2009-10-21
Supplement: Binkley_genome97121_Mutation_Data.zip [file protease_key.xls]

Sequence Name	Database Identifier	Source Database
HIV1oyi	P20892	UniProt
HIV1bh10	P0C6F2	UniProt
HIV1eli	P04589	UniProt
HIV1mceth2220	Q75002	UniProt
HIV1u455	P24740	UniProt
HIV1nybf30	O91080	UniProt
SIVcpzant	Q87622	UniProt
HIV1omvp5180	Q79666	UniProt
HIV2d205	P15833	UniProt
SIVsm	P19505	UniProt
SIVmac	P05897	UniProt
HIV2ben	P18096	UniProt
SIV1hoest	O90273	UniProt
SIVsun	Q9WPP5	UniProt
SIVmnd	P22382	UniProt
SIVagmtan	P89904	UniProt
SIVagm155	P27973	UniProt
SIVagm3	P27980	UniProt
MoMuLV	P03355	UniProt
FrMuLV	P26810	UniProt
GALV	P21414	UniProt
FeLV	O89811	UniProt
VILV	P03370	UniProt
VILV1	P23426	UniProt
VILVK	P35956	UniProt
OMVV	P16901	UniProt
CAEV	P33459	UniProt
FeIVT2	P31822	UniProt
FeIVSD	P19028	UniProt
SMRVprot	P21407	UniProt
JSRVprot	P31625	UniProt
SRV2prot	P51518	UniProt
MPMVprot	P07570	UniProt
SRV1prot	P07570	UniProt
AMVprot	P26315	UniProt
MIAPprot	P11365	UniProt
