# Supplementary figures and images for: ProPhylER: A curated online resource for protein function and structure based on evolutionary constraint analyses
Source: HighWire-hosted journal article supplement (doi:10.1101/gr.097121.109), 2009-10-21

Figure S1

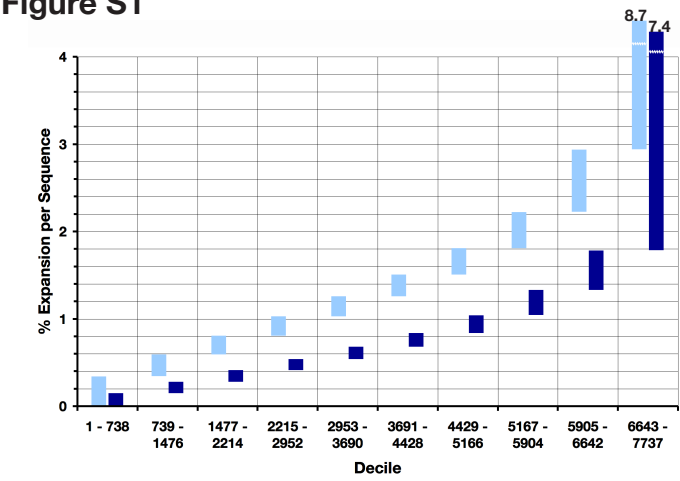

Supplement: Binkley_FigureS1.pdf [file Binkley_FigureS1.pdf]

Figure S2

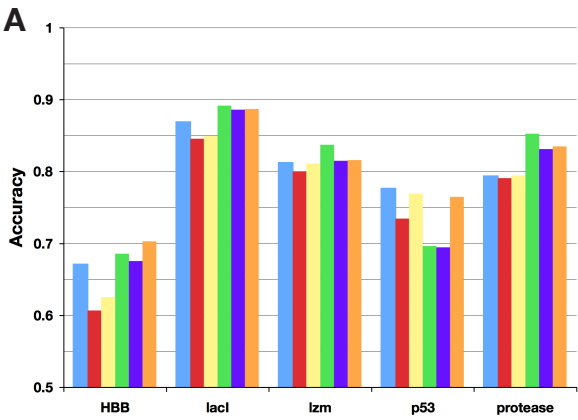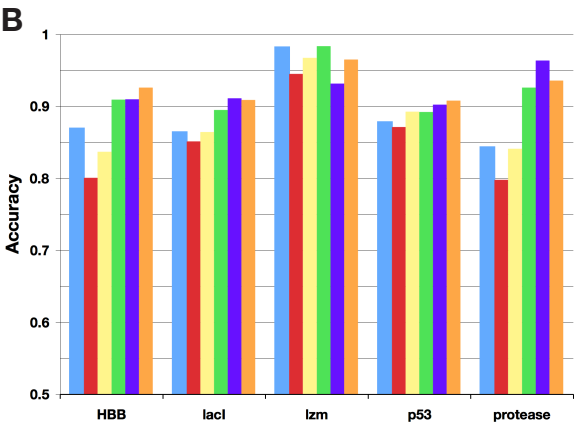

Supplement: Binkley_FigureS2.pdf [file Binkley_FigureS2.pdf]

Figure S3

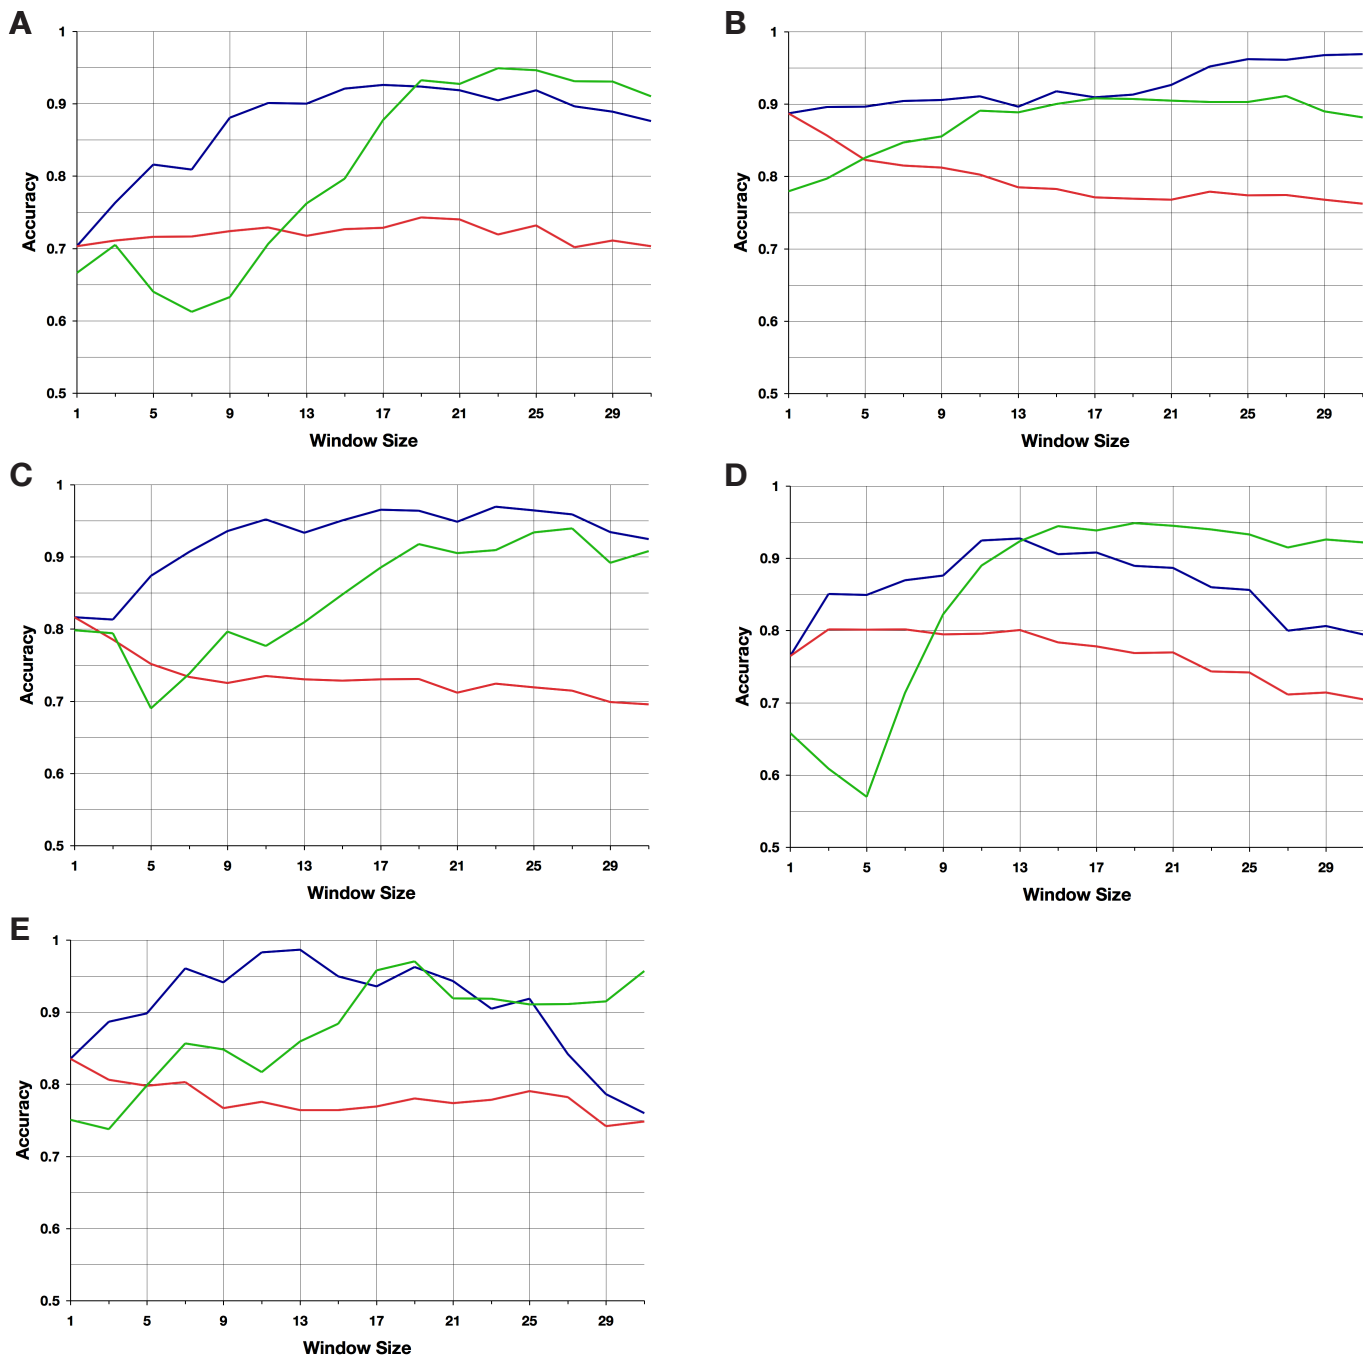

Supplement: Binkley_FigureS3.pdf [file Binkley_FigureS3.pdf]
